# Supplementary material for: Factors Related to Mpox-Vaccine Uptake among Men Who Have Sex with Men in Taiwan: Roles of Information Sources and Emotional Problems
Source: MDPI journal article supplement (doi:10.3390/vaccines12030332), 2024-03-20
Supplement: s1 [file s1]

**Supplementary Table S1.** Factors related to mpox vaccine uptake: Multivariable logistic regression models (N = 389).

|                                                      | <b>Receiving a Mpox vaccination</b> |          |
|------------------------------------------------------|-------------------------------------|----------|
|                                                      | OR (95% CI)                         | <i>p</i> |
| 5-year increment of age                              | 1.430 (1.186–1.725)                 | <0.001   |
| Sexual orientation <sup>a</sup>                      | 0.923 (0.459–1.85)                  | 0.822    |
| Education level <sup>b</sup>                         | 0.851 (0.375–1.929)                 | 0.699    |
| Anxiety                                              | 1.019 (0.976–1.064)                 | 0.398    |
| Depression                                           | 0.931 (0.878–0.986)                 | 0.015    |
| Perceived risk of contracting mpox                   | 1.343 (1.009–1.786)                 | 0.043    |
| Receiving mpox information from social media         | 0.693 (0.337–1.424)                 | 0.318    |
| Receiving mpox information from healthcare providers | 5.339 (3.322–8.581)                 | <0.001   |

CI: confidence interval; OR: odds ratio, <sup>a</sup>gay as reference; <sup>b</sup>senior high school or below as reference.
